# Supplementary material for: A Combined Human Gastruloid Model of Cardiogenesis and Neurogenesis
Source: bioRxiv or medRxiv preprint supplement (doi:10.1101/2022.02.25.481991), 2022-02-25
Supplement: Supplementary file [file media-1.pdf]

## **Supplemental Information**

# **A Combined Human Gastruloid Model of Cardiogenesis and Neurogenesis**

**Zachary T. Olmsted and Janet L. Paluh**

**Figure S1**

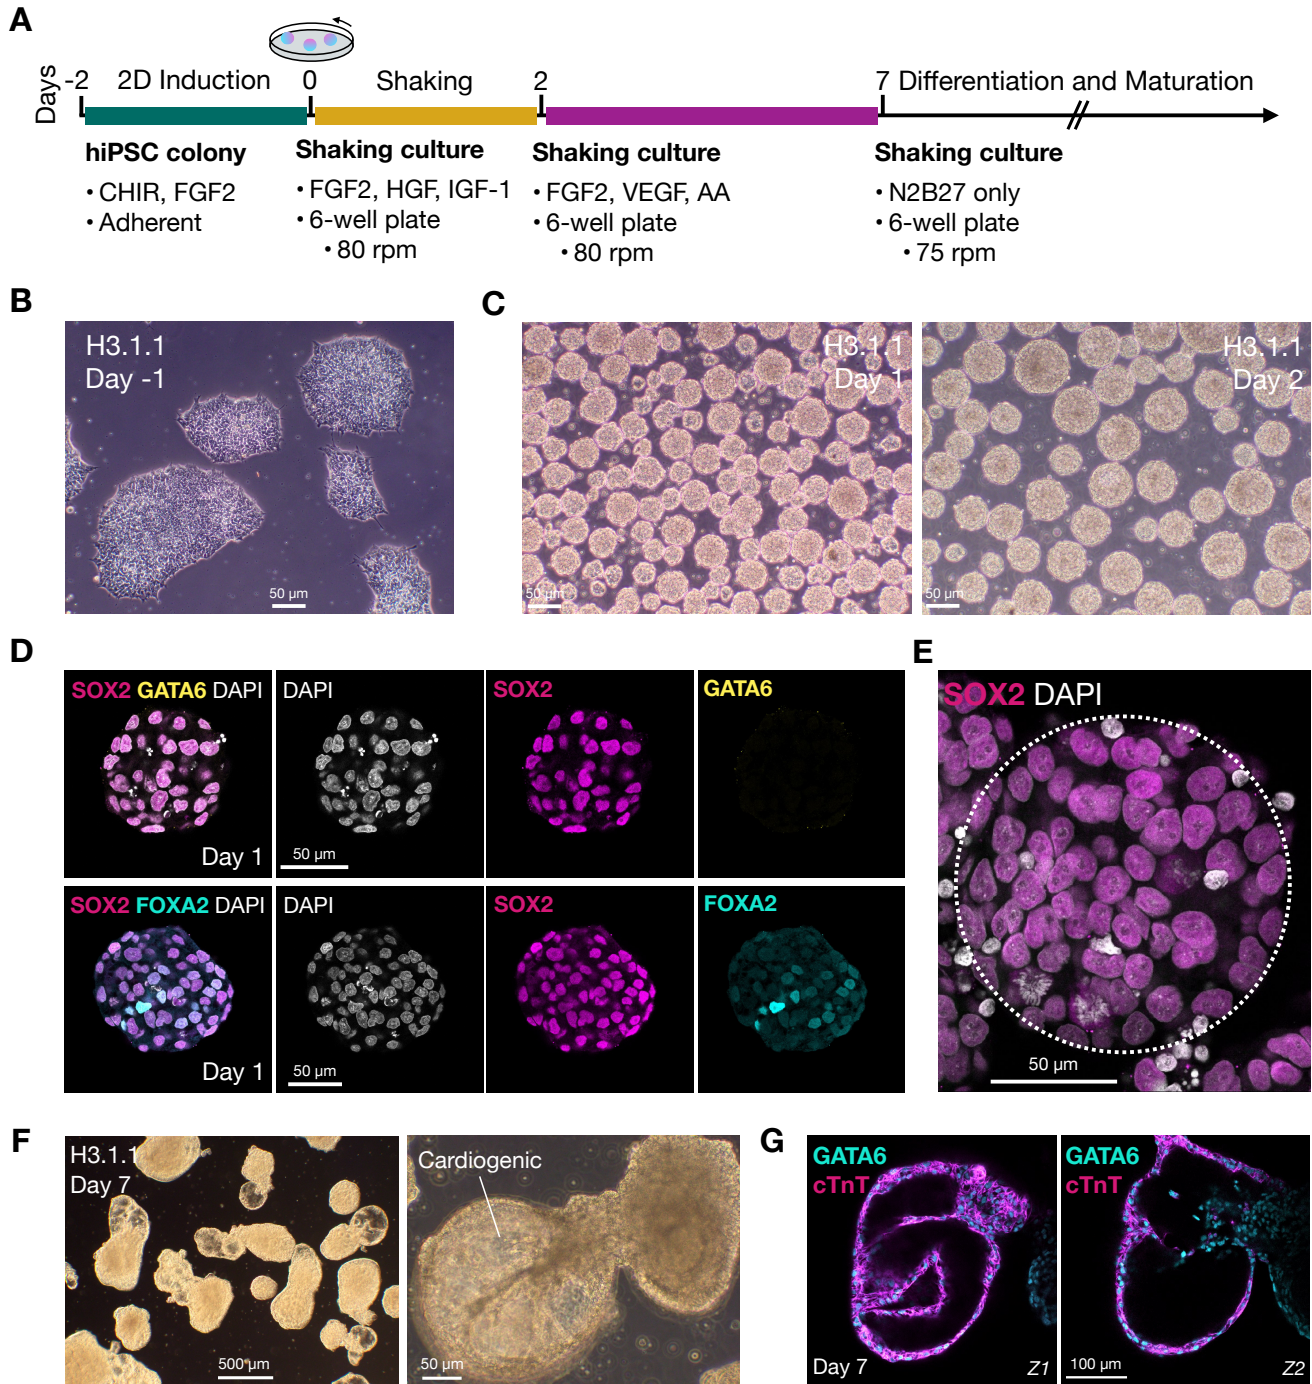

**Figure S1. Directed developmental cardiogenesis and spontaneous contractility in modified neuro-gastro-cardiac EMLOs (EMLOCs), related to Figure 1.** (A) Overview of protocol for EMLOC gastruloid generation. Cardiogenesis was induced at 48 h post-aggregation by addition of VEGF and ascorbic acid (AA). (B) Phase contrast image of 2D hiPSC colonies 24 h after induction with N2B27 + CHIR/FGF2. (C) EMLOC suspension cultures 24 h and 48 h after dissociation and spontaneous aggregation on the orbital shaker. (D) Day 1 aggregates do not express GATA6 (yellow) and exhibit non-uniform FOXA2 expression (cyan) by immunofluorescence. (E) Immunofluorescence in a single day 1 aggregate (white dotted line) demonstrates uniform, non-polarized expression of SOX2 (magenta). Cells are counterstained with DAPI (grey). (F) Phase contrast images of polarized gastruloids with spontaneously contracting cardiogenic chambers (day 7). Annotated EMLOC is shown (right, see also **Movie S2**). (G) Two immunofluorescence Z-slices with cardiac biomarkers GATA6 (blue) and cardiac Troponin-T (cTnT, magenta) in a day 7 gastruloid demonstrating chamber cytoarchitecture. Images are representative of the general EMLOC population at these stages. Individual scale bars provided.

**Figure S2**

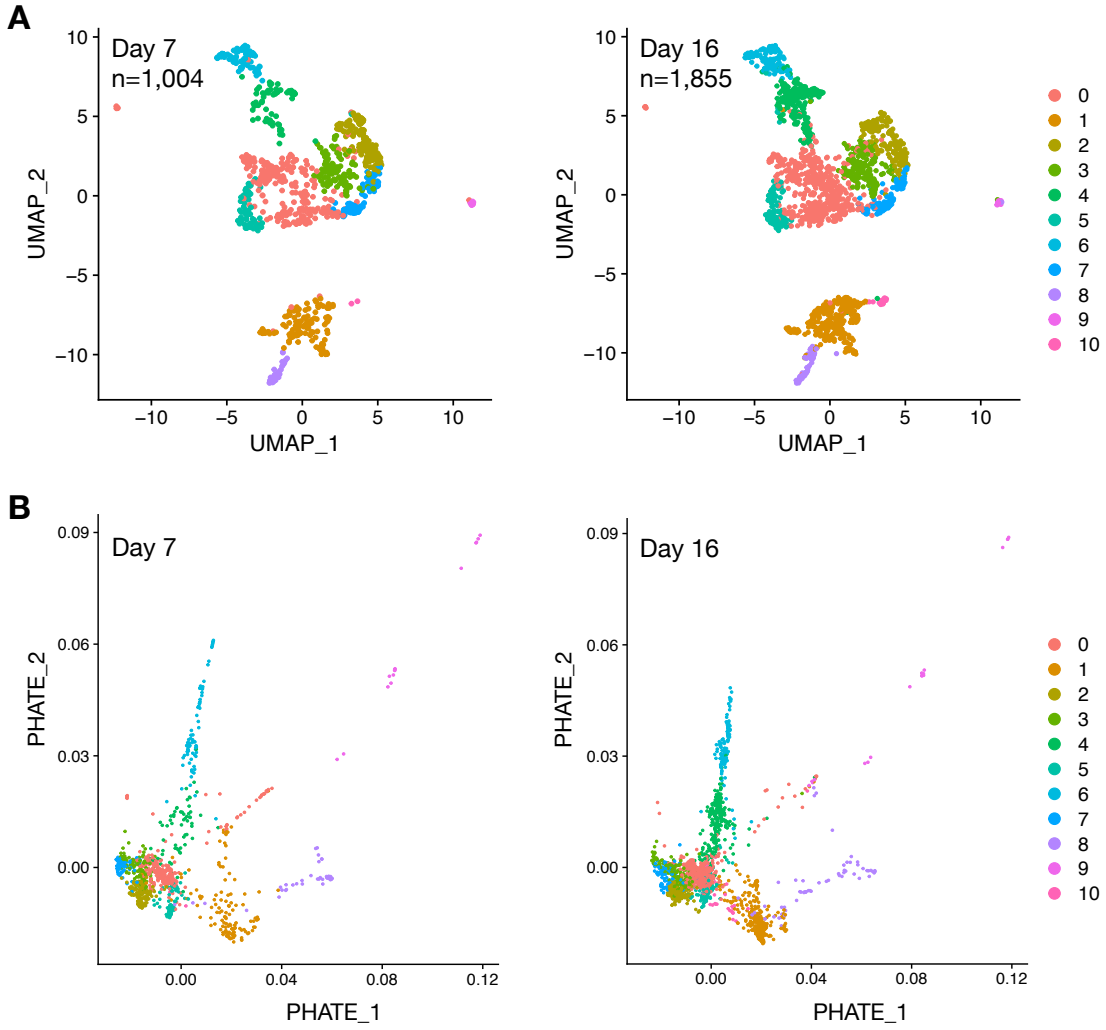



**Figure S2. UMAP and PHATE visualization of scRNAseq for day 7 and day 16 EMLOC time points, related to Figure 1. (A)** UMAP representation of day 7 (1,004 cells) and day 16 (1,855 cells) according to the integrated dataset with ten clusters. **(B)** PHATE representation of samples in **(A)**.

**Figure S3**

**A Splanchnic mesoderm**

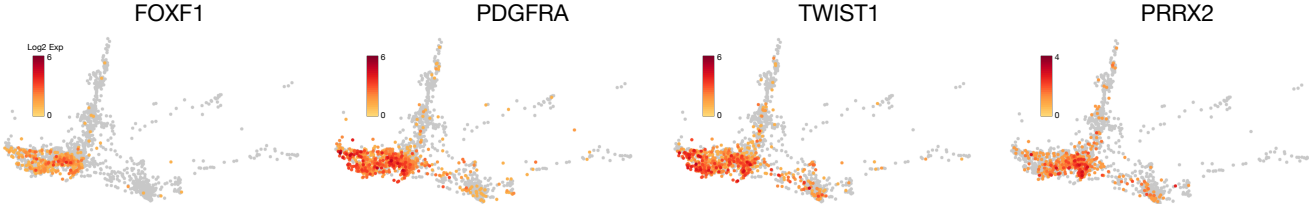

**B Ventricular specification and morphogenesis**

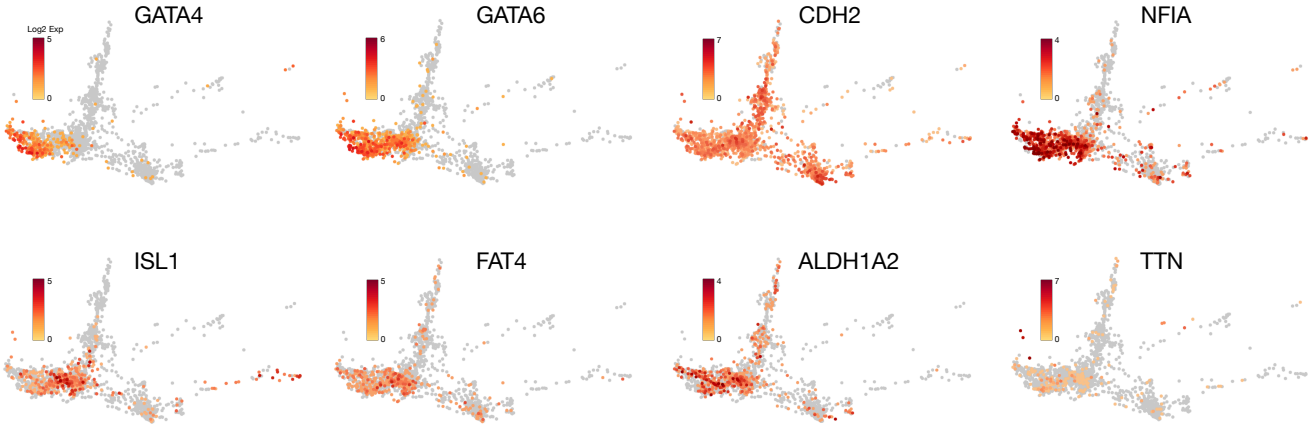

**C Cardiac neural crest cells**

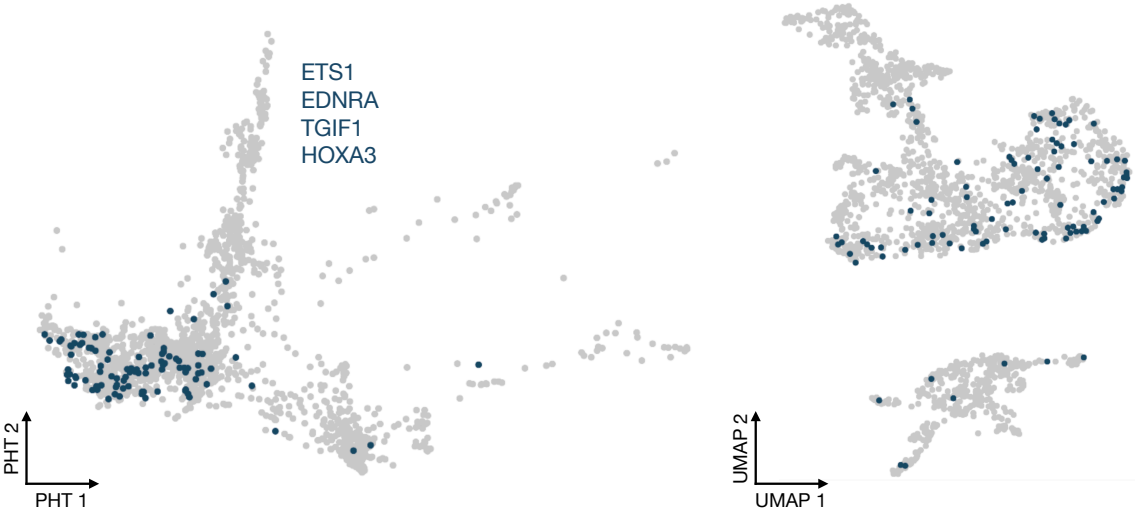

**Figure S3. Developmental features of cardiogenesis in EMLOCs, related to Figure 2. (A)** Characteristic gene biomarkers for splanchnic mesoderm (*FOXF1*, *PDGFRA*, *TWIST1*, *PRRX2*). **(B)** Gene biomarkers of ventricular cell specification and morphogenesis (*GATA4*, *GATA6*, *CDH2*, *NFIA*, *ISL1*, *FAT*, *ALDH1A2*, *TTN*). **(C)** PHATE (left) and UMAP (right) visualization of cells co-expressing *ETS1*, *EDNRA*, *TGIF1*, *HOXA2* consistent with a cardiac neural crest cell phenotype.

**Figure S4**

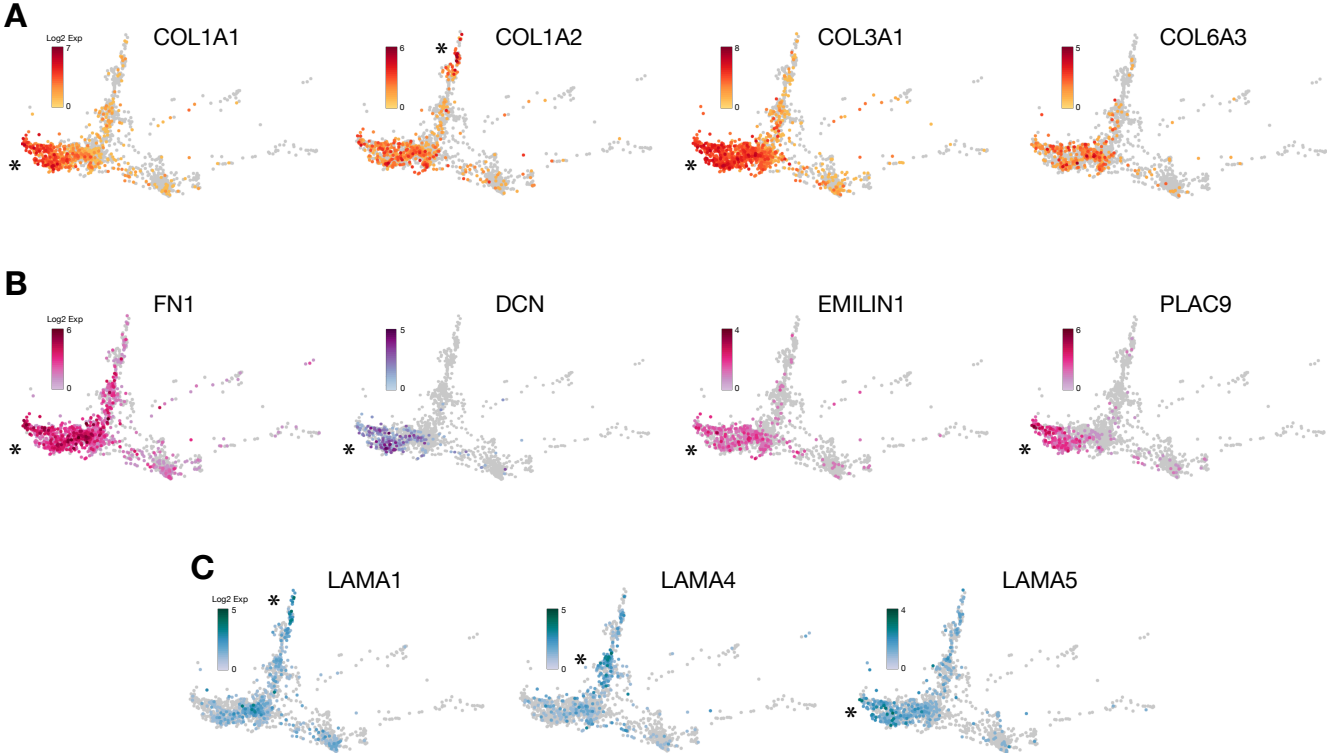

**Figure S4. EMLOCs generate the appropriate cardiac ECM milieu, related to Figure 2. (A)** Four collagen genes (*COL1A1*, *COL1A2*, *COL3A1*, *COL6A3*). **(B)** Glycoprotein (*FN1*) and proteoglycan (*DCN*) genes along with *EMILIN1*, *PLAC9*. **(C)** Three laminin genes (*LAMA1*, *LAMA4*, *LAMA5*) show distinct distributions by PHATE. Asterisk (\*) indicates region of highest expression (Cui et al., 2019).

Figure S5

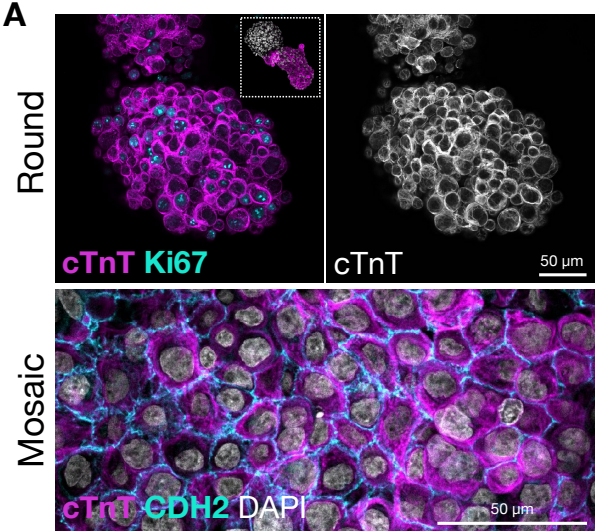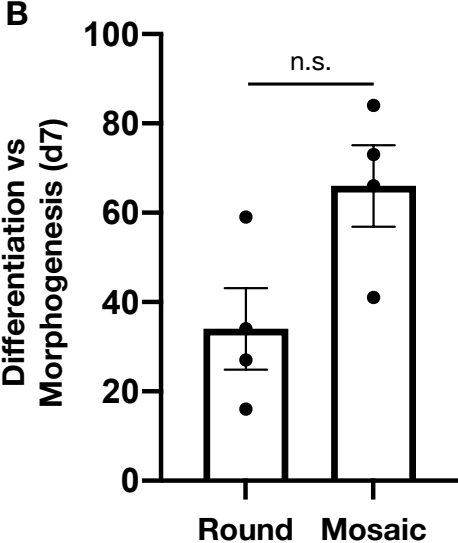

**Figure S5. Assessment of cardiomyocyte morphology with differentiation and morphogenesis states, related to Figure 5.** (A) Relative proportions of day 7 EMLOCs with rounded, proliferating cardiomyocyte progenitors versus flattened, mosaic cardiomyocyte progenitors suggests co-existing phases of differentiation and morphogenesis as previously described for mouse cardiogenesis (N = 4 replicate experiments; n.s.  $p = 0.1776$ ,  $t = 1.754$ ,  $df = 3$  by paired two-tailed t-test). (B) Immunofluorescence examples of rounded, proliferating progenitors (top: cTnT, Ki67) versus flat, mosaic progenitors (bottom: cTnT, CDH2, DAPI). Left inset is example of whole EMLOC with rounded cardiomyocytes. Individual scale bars provided.



Figure S6

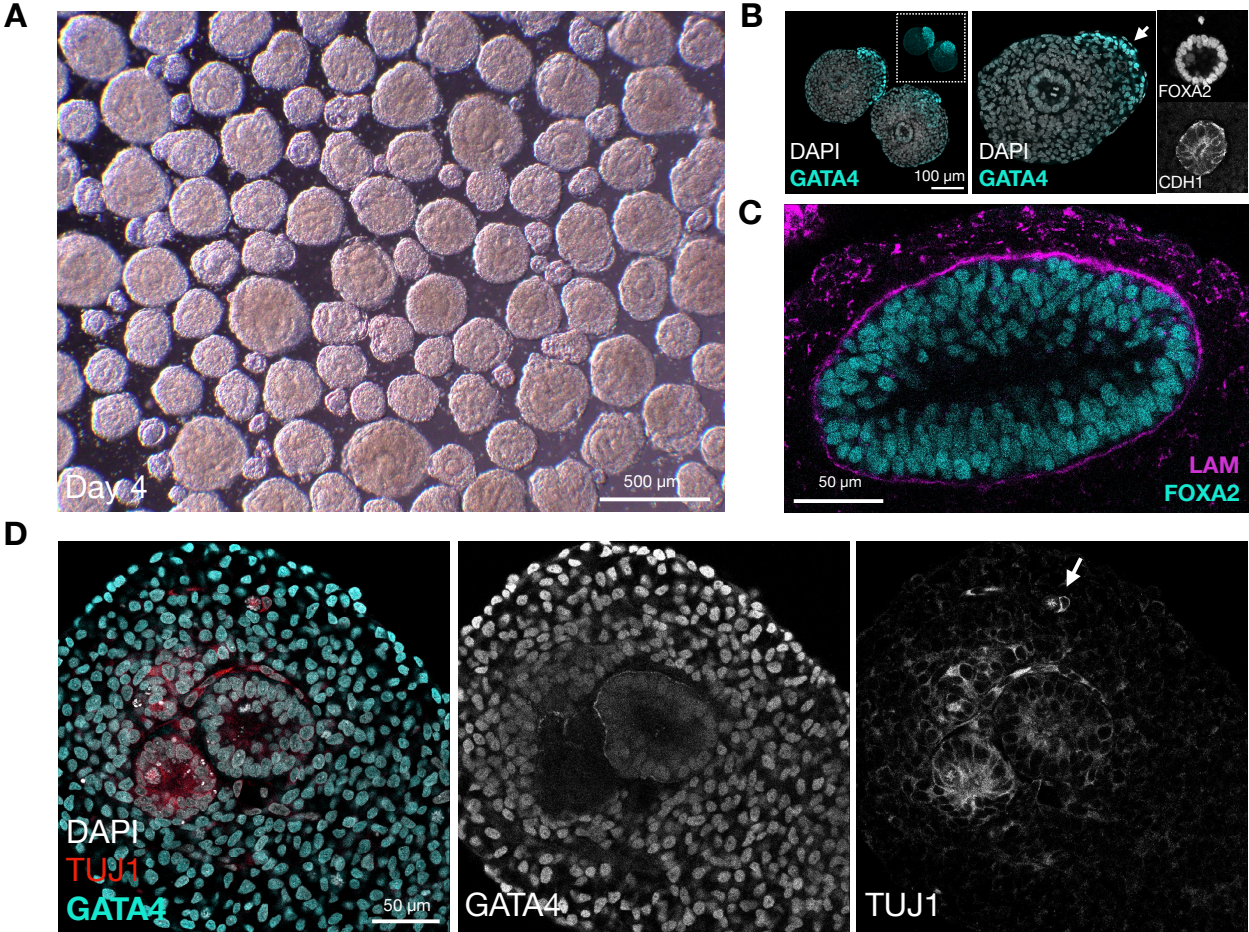

**Figure S6. Additional characterization of the gut tube in EMLOCs, related to Figure 5. (A)** Day 4 EMLOCs with visible gut tube endoderm. **(B)** FOXA2+/CDH1+ gut tube endoderm is self-organized posterior to the GATA4+ cardiac crescent. White arrow points to early serous lining of the cardiac crescent. **(C)** FOXA2+ gut tube endoderm is laminated, where has TUJ1+/GATA4- neural rosettes are more continuous with surrounding cells, labeled in **(D)**. TUJ1 was also observed in mitotic spindle MTs (white arrow). Individual scale bars provided.

Figure S7

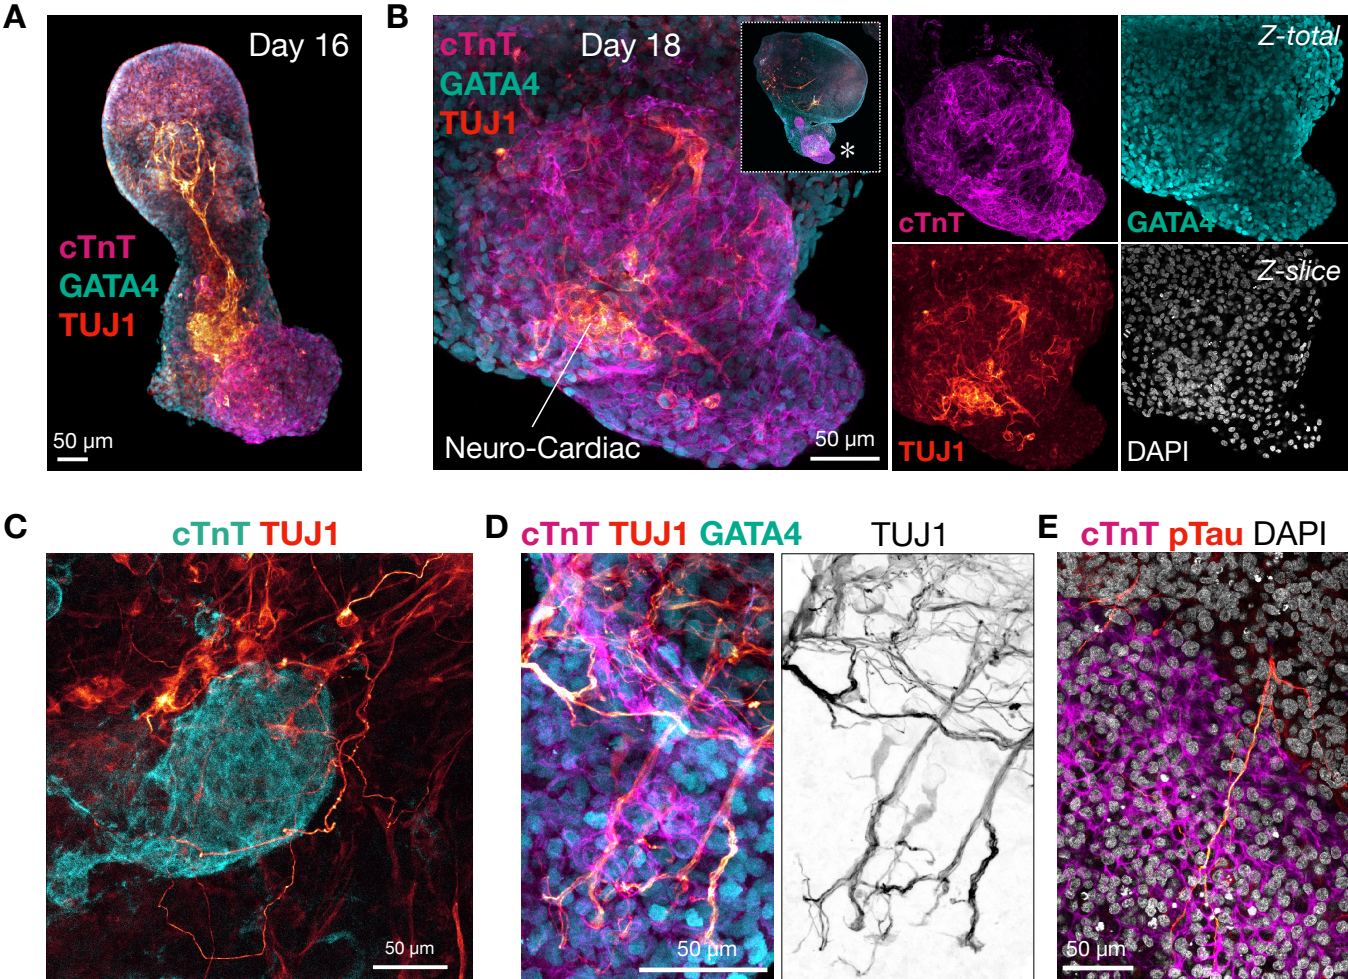

**Figure S7. Additional characterization of neuronal fibers in EMLOCs, related to Figure 8.**

(A) Immunofluorescence of cardiac biomarkers cTnT (magenta) and GATA4 (cyan) along with TUJ1 (red) in day 16 H3.1.1 EMLOCs demonstrate the emergence of neurons proximal to the cardiac region. (B) Immunofluorescence of cTnT (magenta) and TUJ1 (red) at day 18 depicts ganglionated neuronal plexus-like structures in the cardiac region. Merge is shown with individual cTnT, GATA4 (cyan), TUJ1 channels. Left inset is low magnification EMLOC image. (C) TUJ1+ neuronal fiber termination (red) onto cTnT+ cells (cyan) reminiscent of nodal innervation. (D) Cardiac biomarkers cTnT (magenta) and GATA6 (cyan) with TUJ1. (E) Axons identifiable by pTau within the cTnT+ myocardium (right). Individual scale bars provided.



**Table S1. Summary of scRNAseq biomarkers reported in Results, related to Supplementary data file\***

| <b>Cell type, tissue type or process</b> | <b>Biomarker reported</b> |
|------------------------------------------|---------------------------|
| Cell proliferation                       | MKI67                     |
| First heart field                        | TBX5                      |
| First heart field                        | NKX2-5                    |
| First heart field                        | HAND1                     |
| Second heart field                       | HAND2                     |
| Second heart field                       | MEF2C                     |
| Second heart field                       | TBX18                     |
| Second heart field                       | ISL1                      |
| Cardiac sarcomere                        | TNNT2                     |
| Cardiac sarcomere                        | TNNT1                     |
| Cardiac sarcomere                        | MYL7                      |
| Fetal heart development                  | KRT8                      |
| Fetal heart development                  | KRT18                     |
| Fetal heart development                  | APOE                      |
| Fetal heart development                  | PLAC9                     |
| Fetal heart development                  | S100A10                   |
| Splanchnic mesoderm                      | FOXF1                     |
| Splanchnic mesoderm                      | PDGFRA                    |
| Splanchnic mesoderm                      | TWIST1                    |
| Splanchnic mesoderm                      | PRRX2                     |
| Ventricular specification                | GATA4                     |
| Ventricular specification                | GATA6                     |
| Ventricular specification                | CDH2                      |
| Ventricular specification                | NFIA                      |
| Ventricular specification                | ISL1                      |
| Ventricular specification                | FAT4                      |
| Ventricular specification                | ALDH1A2                   |
| Ventricular specification                | TTN                       |
| Left-right asymmetry                     | IRX3                      |
| Left-right asymmetry                     | HAND1                     |

|                              |         |
|------------------------------|---------|
| Left-right asymmetry         | PITX2   |
| Left-right asymmetry         | RTTN    |
| Cardiac neural crest cells   | ETS1    |
| Cardiac neural crest cells   | EDNRA   |
| Cardiac neural crest cells   | TGIF1   |
| Cardiac neural crest cells   | HOXA3   |
| Rapid ventricular conduction | IRX3    |
| Cardiac repolarization       | IRX5    |
| Calcium flux                 | ITPR2   |
| Calcium handling             | SLC8A1  |
| AV conduction, organization  | GJA1    |
| AV conduction, organization  | CACNA1H |
| AV conduction, organization  | TBX3    |
| AV conduction, organization  | CXCL12  |
| AV conduction, organization  | DSP     |
| Atrioventricular valves      | POSTN   |
| Atrioventricular valves      | NPR3    |
| Atrioventricular valves      | TBX3    |
| Atrioventricular valves      | NFATC4  |
| Outflow tract smooth muscle  | CNN1    |
| Outflow tract smooth muscle  | TAGLN   |
| Outflow tract                | ISL1    |
| Outflow tract                | PDE5A   |
| Outflow tract                | CDH11   |
| Outflow tract                | FN1     |
| Outflow tract                | MEGF6   |
| Outflow tract                | MSX2    |
| Outflow tract                | SEMA3C  |
| Outflow tract                | EMILIN1 |
| Cardiac jelly                | VCAN    |
| Cardiac jelly                | ADAMTS1 |
| Cardiac jelly                | ANGPT1  |
| Vascular endothelial cells   | KDR     |

|                            |         |
|----------------------------|---------|
| Vascular endothelial cells | FLT1    |
| Vascular endothelial cells | ESAM    |
| Vascular endothelial cells | CDH5    |
| Vascular endothelial cells | GJA4    |
| Epicardial cells           | WT1     |
| Epicardial cells           | TCF21   |
| Epicardial cells           | TPJ1    |
| Epicardial cells           | LHX2    |
| Epicardial cells           | LHX9    |
| Epicardial cells           | TBX18   |
| Epicardial cells           | PLAC9   |
| Cardiac fibroblast         | IFI16   |
| Cardiac fibroblast         | TBX5    |
| Cardiac fibroblast         | IGFBP5  |
| Cardiac fibroblast         | BTS2    |
| Extracellular matrix       | COL1A1  |
| Extracellular matrix       | COL1A2  |
| Extracellular matrix       | COL3A1  |
| Extracellular matrix       | COL6A3  |
| Extracellular matrix       | FN1     |
| Extracellular matrix       | DCN     |
| Extracellular matrix       | EMILIN1 |
| Extracellular matrix       | PLAC9   |
| Extracellular matrix       | LAMA1   |
| Extracellular matrix       | LAMA4   |
| Extracellular matrix       | LAMA5   |
| Foregut endoderm           | FOXA2   |
| Foregut endoderm           | NKX2-1  |
| Foregut endoderm           | EPCAM   |
| Foregut endoderm           | CDH1    |
| Foregut endoderm           | HHEX    |
| Foregut endoderm           | SHH     |
| Trunk neuroectoderm        | SOX2    |



|                          |         |
|--------------------------|---------|
| Trunk neuroectoderm      | FABP7   |
| Trunk neuroectoderm      | ZIC1    |
| Trunk neuroectoderm      | RFX4    |
| Trunk neuroectoderm      | HES5    |
| Trunk neuroectoderm      | EDNRB   |
| Trunk neuroectoderm      | NTRK2   |
| Trunk neuroectoderm      | OLIG3   |
| Trunk neuroectoderm      | MSX1    |
| Trunk neuroectoderm      | HOXC6   |
| Trunk neuroectoderm      | HOXC9   |
| Neuronal                 | STMN2   |
| Neuronal                 | GAP43   |
| Neuronal                 | TUBB3   |
| Neuronal                 | ELAVL3  |
| Neuronal                 | DLG4    |
| Neuronal                 | CAMK2A  |
| Neuronal                 | SLC18A3 |
| Neuronal                 | SLC17A6 |
| Neuronal                 | CHRNA3  |
| Neuronal                 | NTRK3   |
| Sensory neuron           | POU4F1  |
| Motor neuron             | MNX1    |
| Autonomic neuron         | PHOX2B  |
| Autonomic neuron         | ASCL1   |
| Sympathetic neuron       | INSM1   |
| Sympathetic neuron       | ISL1    |
| Schwann cell glia        | SOX10   |
| Schwann cell glia        | PLP1    |
| Schwann cell glia        | MPZ     |
| Schwann cell glia        | S100B   |
| Schwann cell glia        | TFAP2B  |
| Schwann cell glia        | NGFR    |
| Neuro-cardiac patterning | NPY     |

|                          |        |
|--------------------------|--------|
| Neuro-cardiac patterning | BDNF   |
| Neuro-cardiac patterning | SEMA3A |
| Neuro-cardiac patterning | PRPH   |
| Neuro-cardiac patterning | EDNRA  |
| Neuro-cardiac patterning | ISL1   |
| Renal                    | MAL    |
| Renal                    | SIM1   |
| Renal                    | EPCAM  |
| Renal                    | TFAP2A |
| Renal                    | SIX1   |
| Renal                    | WT1    |
| Renal                    | ITGA8  |
| Renal                    | EYA1   |
| Renal                    | PAX2   |
| Renal                    | PAX8   |
| Renal                    | LHX1   |
| Renal                    | EMX2   |
| BMP signaling            | BMP4   |
| BMP signaling            | BMP7   |
| WNT signaling            | WNT2B  |
| WNT signaling            | WNT1   |
| WNT signaling            | WNT3A  |
| Hox code                 | HOXA4  |
| Hox code                 | HOXC9  |
| Hox code                 | HOXD8  |
| Cadherin                 | CDH1   |
| Cadherin                 | CDH6   |
| Cadherin                 | CDH11  |

\*An extended version of this table appears as a Supplementary data file
